# Supplementary material for: Electrodeposited CoP2 on CO2-laser-modified graphite felt: a robust electrocatalyst for nitrite reduction to ammonia
Source: Royal Society of Chemistry journal article supplement (doi:10.1039/d5ta02053k), 2025-01-01
Supplement: d5ta02053k1.pdf [file d5ta02053k1.pdf]

## Supporting Information

for

### **Electrodeposited CoP<sub>2</sub> on CO<sub>2</sub>-Laser-Modified Graphite Felt: A Robust Electrocatalyst for Nitrite Reduction to Ammonia**

Chae Eun Park <sup>a,†</sup>, Rahul Kerkar <sup>a,†</sup>, Deepak Arumugam <sup>b,†</sup>, Jayaraman Theerthagiri <sup>a</sup>, Shankar  
Ramasamy <sup>b</sup>, Myong Yong Choi <sup>a,c\*</sup>

<sup>a</sup> Department of Chemistry (BK21 FOUR), Research Institute of Advanced Chemistry,  
Gyeongsang National University, Jinju 52828, Republic of Korea

<sup>b</sup> Molecular Simulation Laboratory, Department of Physics, Bharathiar University, Coimbatore  
641046, Tamil Nadu, India

<sup>c</sup> Core-Facility Center for Photochemistry & Nanomaterials, Gyeongsang National University,  
Jinju 52828, Republic of Korea

\*Correspondence Email address: [mychoi@gnu.ac.kr](mailto:mychoi@gnu.ac.kr) (M.Y. Choi)

<sup>†</sup> These authors contributed equally to this work

## Characterization

A range of analytical techniques was employed to evaluate the crystallinity, morphology, elemental composition, chemical bonding, and analyte quantification of the synthesized electrocatalysts. The crystallinity and phase composition were analyzed using X-ray diffraction (XRD) with a Bruker D8 Advance A25 diffractometer equipped with a CuK $\alpha$  radiation source ( $\lambda = 1.54 \text{ \AA}$ ). The diffraction patterns were recorded at a scan rate of  $0.05^\circ \text{ s}^{-1}$  over a  $2\theta$  range of  $20^\circ - 60^\circ$ , ensuring high-resolution phase identification. Raman spectroscopy was performed using a Thermo Scientific DXR2xi Raman imaging microscope to elucidate the structural characteristics of the catalysts. The morphology and elemental distribution were examined via field emission scanning electron microscopy (FESEM) on a TESCAN S8000 instrument, equipped with an Ultim Max energy-dispersive X-ray spectroscopy (EDS) detector (Oxford Instruments). X-ray photoelectron spectroscopy (XPS) was conducted using a Thermo Scientific Nexsa G2 instrument to determine the chemical states and bonding environment of the elements within the synthesized material. The quantification of ammonium ions ( $\text{NH}_4^+$ ) was performed spectrophotometrically using a Thermo Scientific Evolution 600 UV-Vis spectrophotometer, with measurements recorded in the visible range of 400–800 nm. Additionally,  $^1\text{H}$  NMR spectroscopy was employed for  $\text{NH}_4^+$  quantification using a Bruker Avance-III 300 NMR spectrometer operating at 300 MHz.

## Electrocatalytic Activity Study

The catalytic performance of the synthesized electrocatalysts for the nitrite reduction reaction ( $\text{NO}_2\text{RR}$ ) was evaluated in a two-compartment, three-electrode electrochemical system using a CHI708E electrochemical workstation (CHI Instruments, USA). The reaction was conducted in 0.1 M  $\text{KNO}_2$  solution, with a Nafion membrane serving as both a proton-exchange membrane and an electrolyte separator. Prior to use, the Nafion membrane was pretreated by

sequential immersion in 3% H<sub>2</sub>O<sub>2</sub> for 1 h, deionized water for 2 h, and 0.5 M H<sub>2</sub>SO<sub>4</sub> for 1 h at 80 °C. Graphite felt modified with the electrocatalyst was employed as the working electrode, a Hg/HgO electrode was used as the reference electrode, and a graphite rod served as the counter electrode. The measured potentials were converted to the reversible hydrogen electrode (RHE) scale using the standard equation:  $E_{\text{RHE}} = E_{\text{Hg/HgO}} + (0.098 + 0.0591 \times \text{pH})$ . Linear sweep voltammetry (LSV) was conducted to assess NO<sub>2</sub>RR activity over an anodic potential range of −0.6 to −1.9 V vs. Hg/HgO, at a scan rate of 5 mV s<sup>−1</sup>. The Tafel slope was determined using the equation:  $\eta = b \times \log(j/j_0)$ , where  $\eta$  represents the overpotential,  $b$  is the Tafel slope,  $j$  is the current density, and  $j_0$  is the exchange current density. Bulk NO<sub>2</sub>RR analysis was performed at a constant potential for 1 h in 45 mL of catholyte, with continuous stirring at 300 rpm to ensure homogeneous mixing.

## Quantification of NH<sub>4</sub><sup>+</sup>

### *Colorimetric indophenol blue method*

The concentration of NH<sub>4</sub><sup>+</sup> generated during NO<sub>2</sub>RR was determined using the colorimetric indophenol blue method, followed by UV-Vis spectrophotometric analysis. Reaction aliquots were collected at 1 h intervals, and 2 mL of the collected sample was mixed with 2 mL of 1.0 M NaOH containing 5 wt% sodium citrate (C<sub>6</sub>H<sub>5</sub>Na<sub>3</sub>O<sub>7</sub>·2H<sub>2</sub>O) and 5 wt% salicylic acid (C<sub>7</sub>H<sub>6</sub>O<sub>3</sub>). Subsequently, 2 mL of 0.05 M NaCl and 0.2 mL of 1 wt% sodium nitroferricyanide dihydrate (C<sub>5</sub>H<sub>4</sub>FeN<sub>6</sub>Na<sub>2</sub>O<sub>3</sub>·2H<sub>2</sub>O) were added. The solution was allowed to stand for 2 hrs to develop the characteristic indophenol blue coloration. The absorbance was measured at a wavelength of 655 nm ( $\lambda_{\text{max}}$ ), and the NH<sub>4</sub><sup>+</sup> concentration was quantified using a calibration curve constructed from standard NH<sub>4</sub>Cl solutions with concentrations of 0, 10, 50, 100, and 200 ppm. This method provided a reliable estimation of NH<sub>4</sub><sup>+</sup> formation during NO<sub>2</sub>RR.

### *<sup>1</sup>H Nuclear Magnetic Resonance (<sup>1</sup>H NMR) Studies*

<sup>1</sup>H NMR Spectroscopy for NH<sub>4</sub><sup>+</sup> Quantification <sup>1</sup>H NMR spectroscopy was employed to confirm NH<sub>4</sub><sup>+</sup> formation and to determine its concentration based on peak area integration. For NMR analysis, 1 mL of the reaction solution collected after 1 h of NO<sub>2</sub>RR was mixed with 0.5 mL of deuterium oxide (D<sub>2</sub>O). The pH of the solution was adjusted to ~2 using 0.5 M H<sub>2</sub>SO<sub>4</sub> to optimize NH<sub>4</sub><sup>+</sup> detection conditions. The <sup>1</sup>H NMR spectra exhibited three distinct peaks at  $\delta$  = 7.25, 6.95, and 6.65 ppm, corresponding to NH<sub>4</sub><sup>+</sup> ions. The unknown NH<sub>4</sub><sup>+</sup> concentration was determined by referencing a calibration curve generated from standard NH<sub>4</sub>Cl solutions with concentrations of 1, 5, 10, and 20 mM (equivalent to ~18, 90, 180, and 360 ppm, respectively). This analytical approach effectively confirmed and quantified NH<sub>4</sub><sup>+</sup> formation during the catalytic NO<sub>2</sub>RR process.

### **Computational Details**

First-principles density functional theory (DFT) calculations were performed to investigate the NO<sub>2</sub>RR performance of the CoP<sub>2</sub>/GO-GF structure using the Vienna *Ab initio* Simulation Package (VASP)<sup>1, 2</sup>. The spin-polarized Perdew–Burke–Ernzerhof (PBE) functional, based on the generalized gradient approximation (GGA), was employed to describe the electron–ion interactions. The electron cloud was modeled using a plane-wave basis set in conjunction with projector augmented wave (PAW) pseudopotentials<sup>3, 4</sup>. To account for weak interactions, Grimme’s dispersion correction (D3) with Becke–Johnson damping was incorporated<sup>5</sup>. The convergence criteria for the electronic self-consistent field (SCF) steps and the interatomic forces were set to 10<sup>−6</sup> eV and 0.01 eV/Å, respectively, for all systems. The Brillouin zone was sampled using the Monkhorst–Pack scheme with a 5 × 5 × 1 *k*-mesh and Gaussian smearing. The plane-wave expansion was confined within a cutoff energy of 520 eV<sup>6</sup>. For density of states (DOS) calculations, a denser 11 × 11 × 1 *k*-point grid was employed

using the tetrahedron method with Blöchl corrections <sup>7</sup>. To prevent interactions with periodic images a vacuum separation of 30 Å was maintained in the z-direction. Additional details regarding electrochemical calculations are provided in the Supporting Information.

## Computational details

### 1. Cohesive energy ( $E_C$ )

The cohesive energy of the heterostructure ( $E^{coh}$ ) is calculated using the relation,

$$E_C = \frac{E_{CoP_2/GO} - (N_C E_C + N_{Co} E_{Co} + N_P E_P + N_O E_O + N_H E_H)}{N}$$

Where,  $E_{CoP_2/GO}$  is the total energy of CoP<sub>2</sub>/GO structure obtained from the ground states structure,  $E_C, E_{Co}, E_P, E_O$ , and  $E_H$  are the energy of the individual atoms found from their stable structure and  $N_C, N_{Co}, N_P, N_O$ , and  $N_H$  is the number of corresponding atoms that are present in the CoP<sub>2</sub>/GO structure and  $N$  is the total number of atoms.

### 2. Formation energy ( $E_F$ )

The formation energy ( $E_F$ ) of the CoP<sub>2</sub>/GO structure is calculated from the following relation,

$$E_f = E_{CoP_2/GO} - (E_{CoP_2} + E_{GO})$$

Where,  $E_{CoP_2/GO}$  is the total energy of CoP<sub>2</sub>/GO structure,  $E_{CoP_2}$  and  $E_{GO}$  are the total energy of the individual CoP<sub>2</sub> and GO structures.

### 3. Elementary steps of NO<sub>2</sub>RR

To study the electrochemical performance, the computational hydrogen electrode (CHE) model proposed Nørskov et al., is adapted <sup>8</sup>.

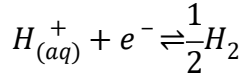

For the NO<sub>2</sub>RR, the reaction occurs via  $9e^-$  pathway as given below <sup>9, 10</sup>,

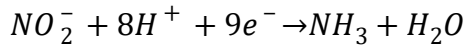

The elementary steps for the reaction are given as,

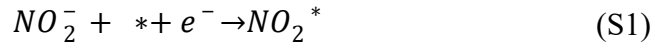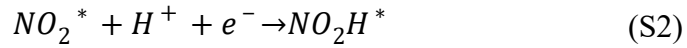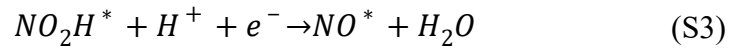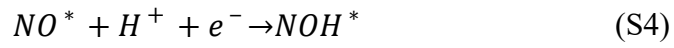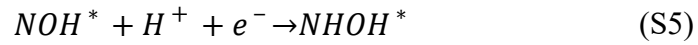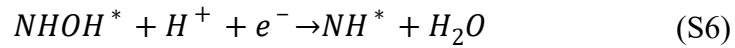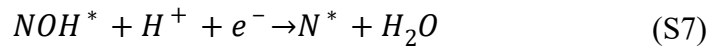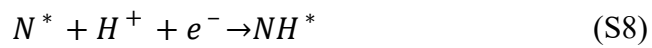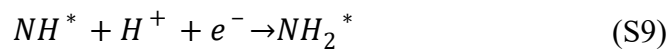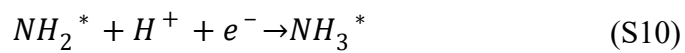

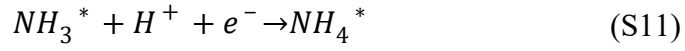

The Gibbs free energy for the adsorption of the intermediates ( $NO_2^*$ ,  $NHO_2H^*$ ,  $NOH^*$ ,  $NHOH^*$ ,  $N^*$ ,  $NH^*$ ,  $NH_2^*$ ,  $NH_3^*$ , and  $NH_4^*$ ) and for the reaction steps (S1 – S11) determines the catalytic property materials, which is calculated as,

$$\Delta G = \Delta E + \Delta ZPE - T\Delta S$$

where  $\Delta E$  is the adsorption energy of the intermediates,  $\Delta ZPE$  and  $T\Delta S$  are the change in zero-point energy and entropy at 298.15 K.

#### 4. Faradaic efficiency (FE)

The relation for the Faradaic efficiency (FE) of the  $NO_2RR$  is considered from the previous literatures as <sup>10, 11</sup>,

$$FE = \left[ \frac{1}{1 + \exp\left(\frac{-\Delta G}{K_B T}\right)} \right] \times 100$$

Where,  $\Delta G$  is the maximum free energy change observed for the reaction steps (S1 – S11),

$K_B$  is the Boltzmann constant ( $8.617 \times 10^{-5}$  eV K<sup>-1</sup>),  $T$  is the temperature (298.15 K).

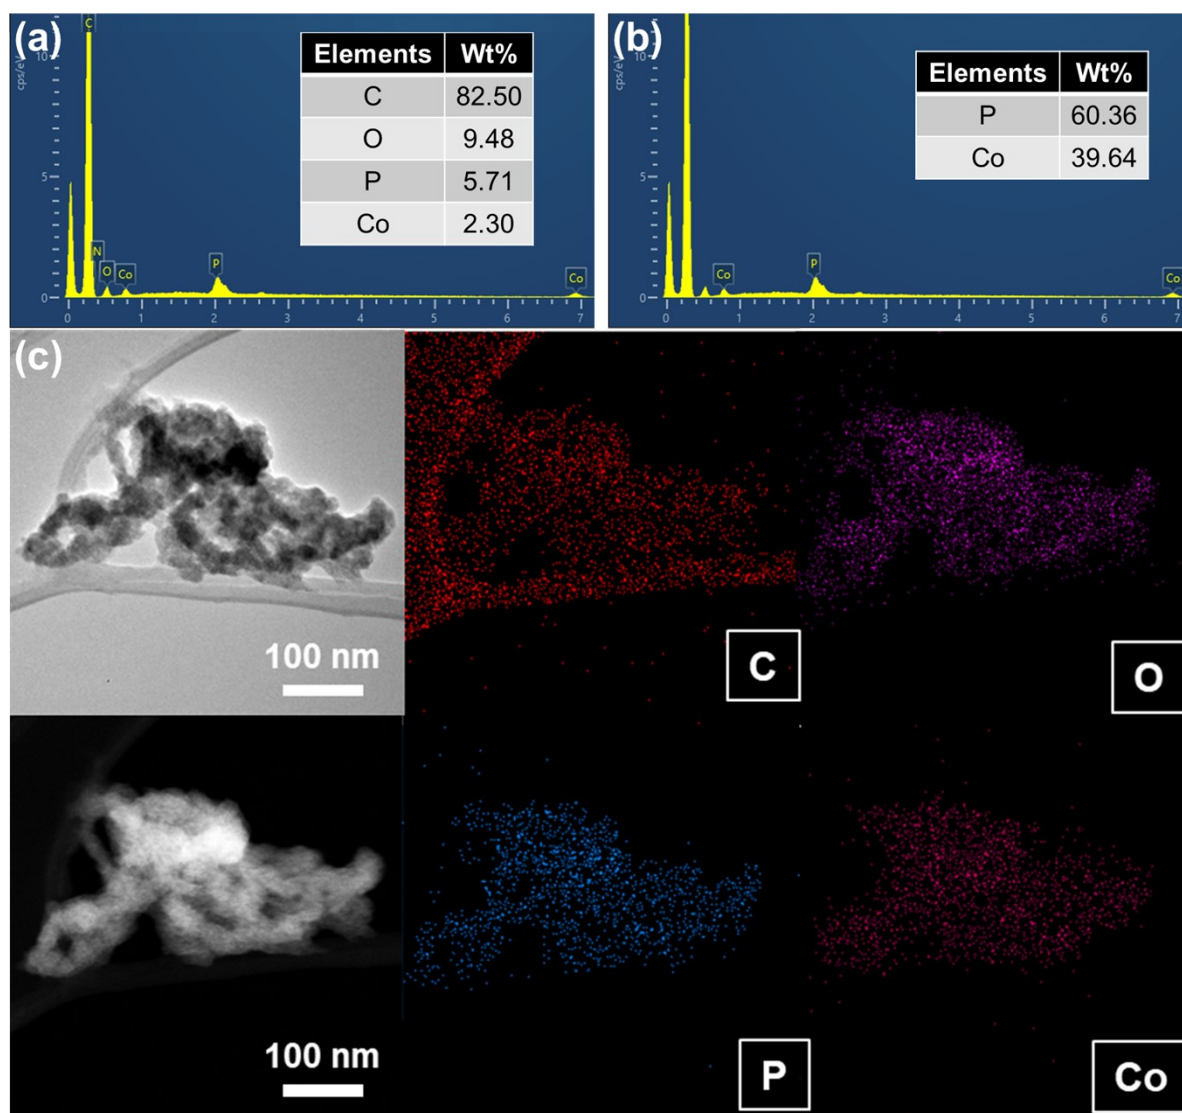

**Figure S1.** FESEM-EDS spectra of the as-synthesized CoP<sub>2</sub>/GO-GF, showing the presence of (a) C, O, P, and Co elements, and (b) P and Co elements without C and O; and (c) TEM studies on CoP<sub>2</sub>/GO-GF.



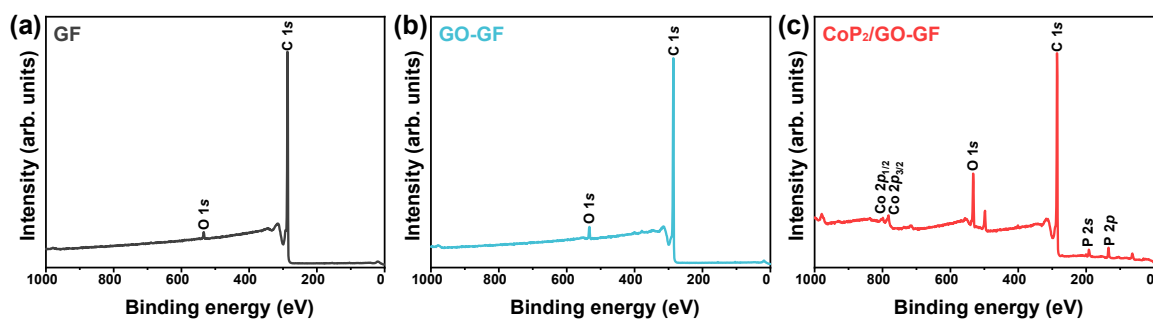

**Figure S2.** XPS survey spectra of (a) GF, (b) GO-GF, and (c) CoP<sub>2</sub>/GO-GF.

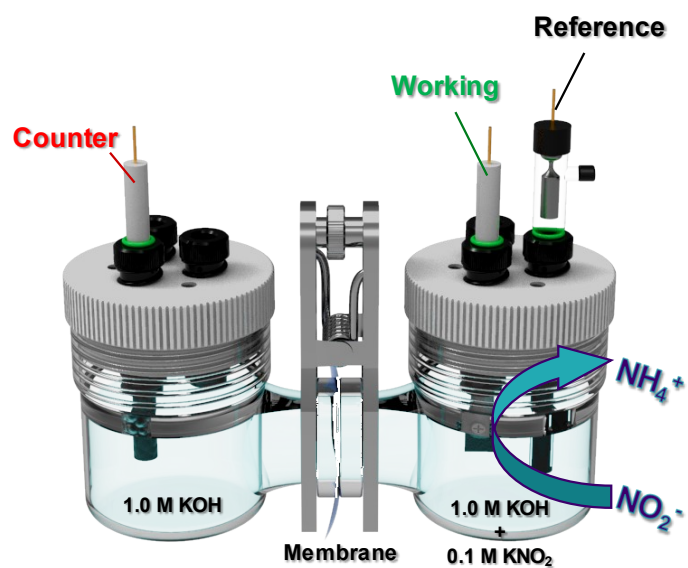

**Figure S3.** Schematic representation of the two-electrode cell system for NO<sub>2</sub>RR.

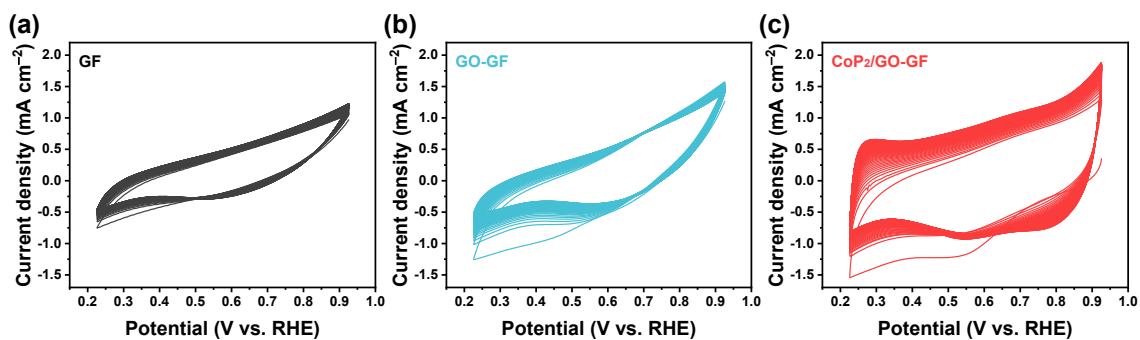

**Figure S4.** Cyclic voltammograms of (a) GF, (b) GO-GF, and (c) CoP<sub>2</sub>/GO-GF.

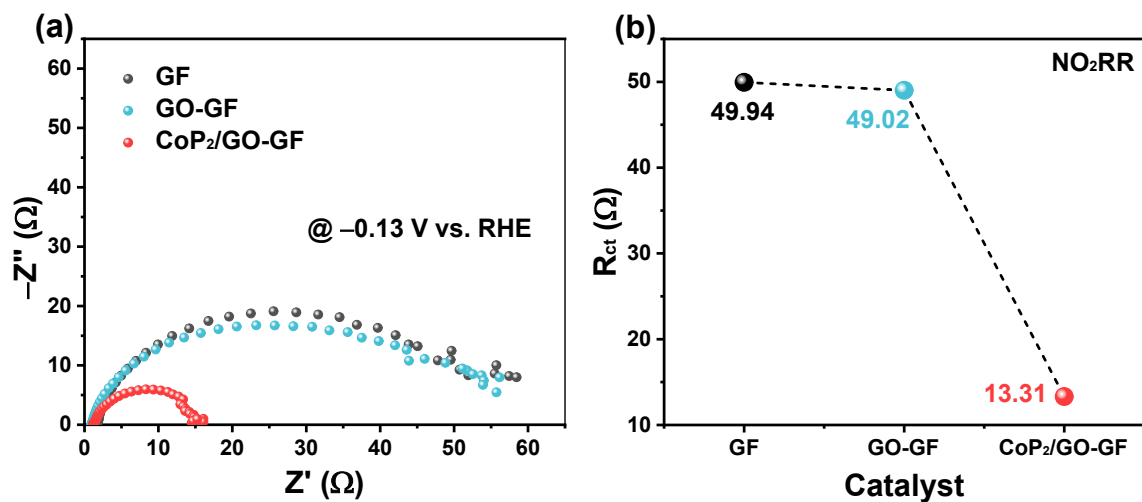

**Figure S5.** Electrochemical impedance spectroscopy (EIS) analysis of bare GF, GO-GF, and CoP<sub>2</sub>/GO-GF at  $-0.13$  V vs. RHE during NO<sub>2</sub>RR: (a) Nyquist plots and (b) corresponding charge transfer resistance ( $R_{ct}$ ) values.

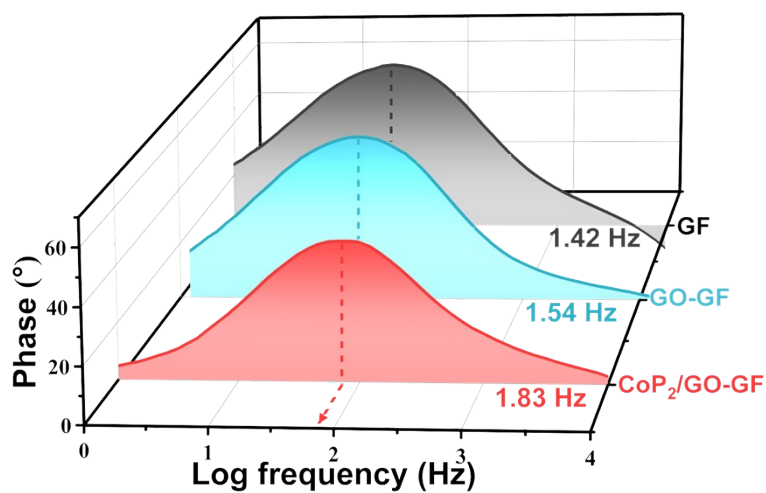

**Figure S6.** Bode plots of bare GF, GO-GF, and CoP<sub>2</sub>/GO-GF at  $-0.13$  V vs. RHE during the NO<sub>2</sub>RR.

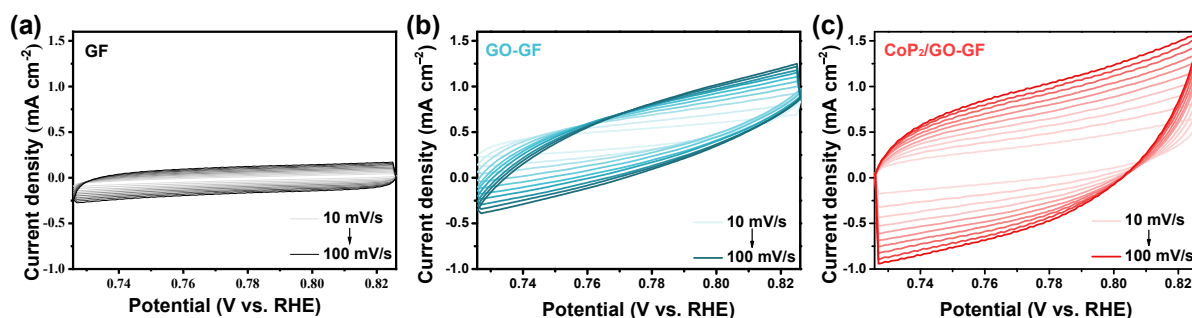

**Figure S7.** CV curves of (a) bare GF, (b) GO-GF, and (c) CoP<sub>2</sub>/GO-GF samples measured in the non-Faradic portion in 1.0 M KOH + 0.5 M KNO<sub>2</sub> at different scan rates from 10-100 mV s<sup>-1</sup>.

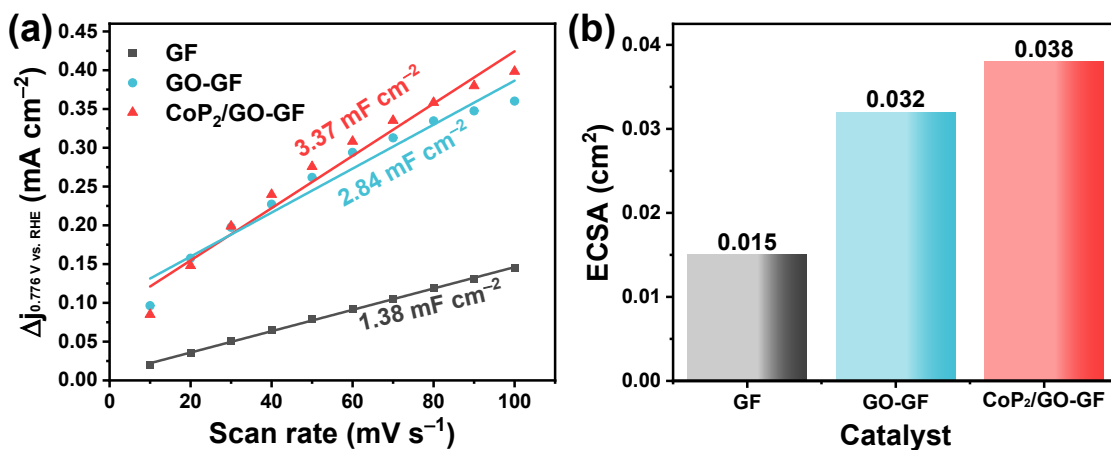

**Figure S8.** Double-layer capacitance ( $C_{dl}$ ) and electrochemical surface area (ECSA) of bare GF, GO-GF, and CoP<sub>2</sub>/GO-GF studied during the NO<sub>2</sub>RR.

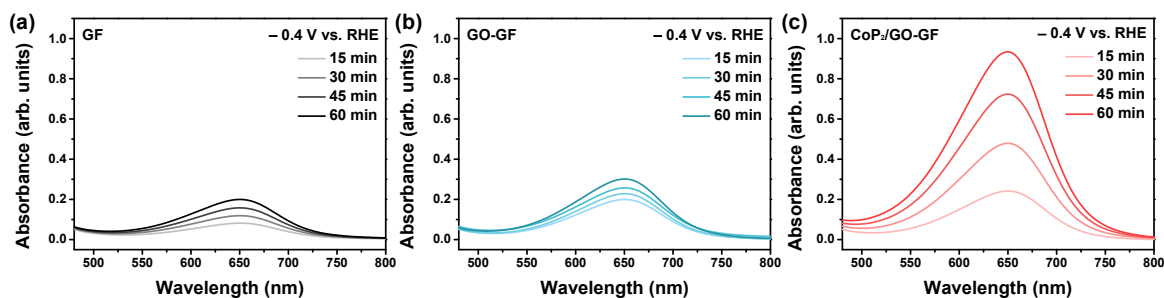

**Figure S9.** UV-Vis absorption spectra of (a) bare GF, (b) GO-GF, and (c) CoP<sub>2</sub>/GO-GF samples measured at -0.4 V vs. RHE.

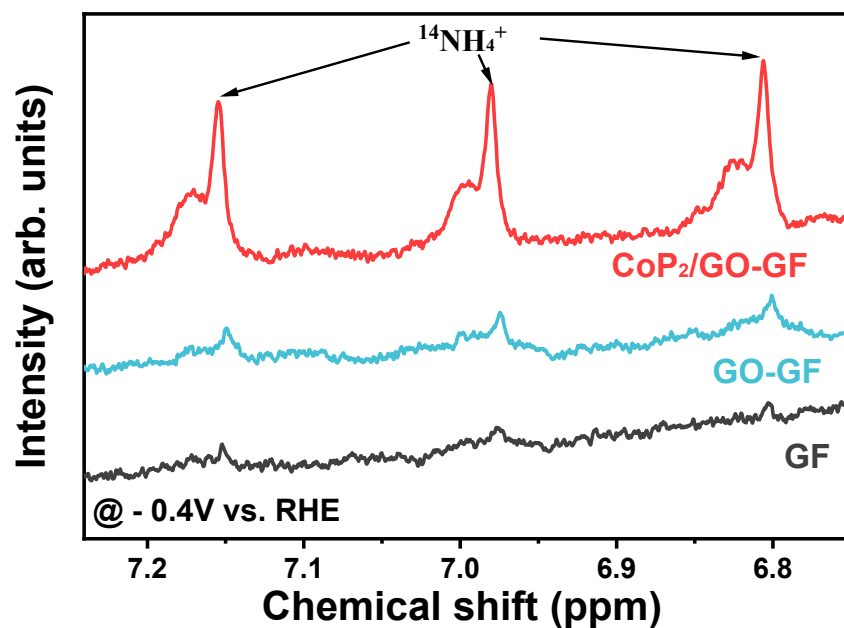

**Figure S10.**  $^1\text{H}$  NMR spectra of the catholyte solutions after 60 minutes of  $\text{NO}_2\text{RR}$  over bare GF, GO-GF, and  $\text{CoP}_2/\text{GO-GF}$  at  $-0.4\text{ V}$  vs. RHE.

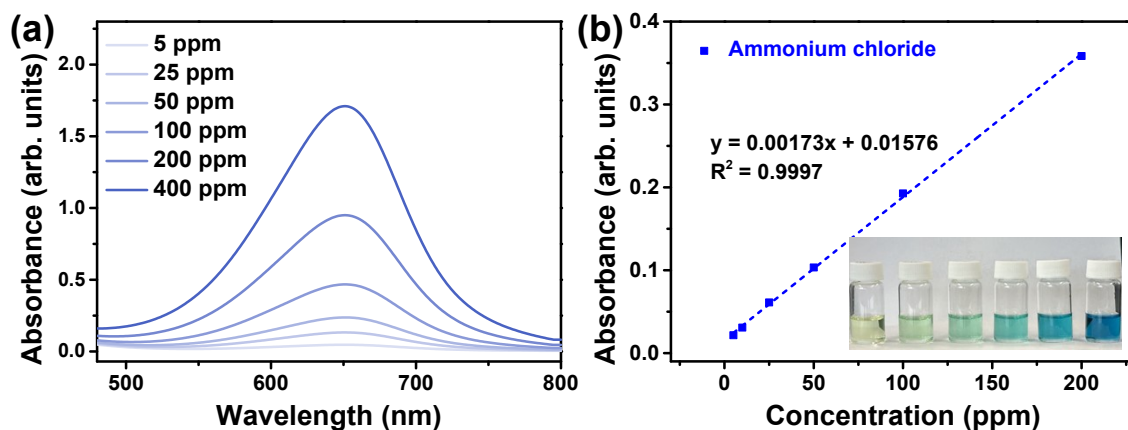

**Figure S11.** Calibration curves for ammonium ion ( $\text{NH}_4^+$ ) determination: (a) absorbance vs. concentration and (b) linear regression analysis of  $\text{NH}_4\text{Cl}$  standard solutions (5, 10, 25, 50, 100, and 200 ppm).

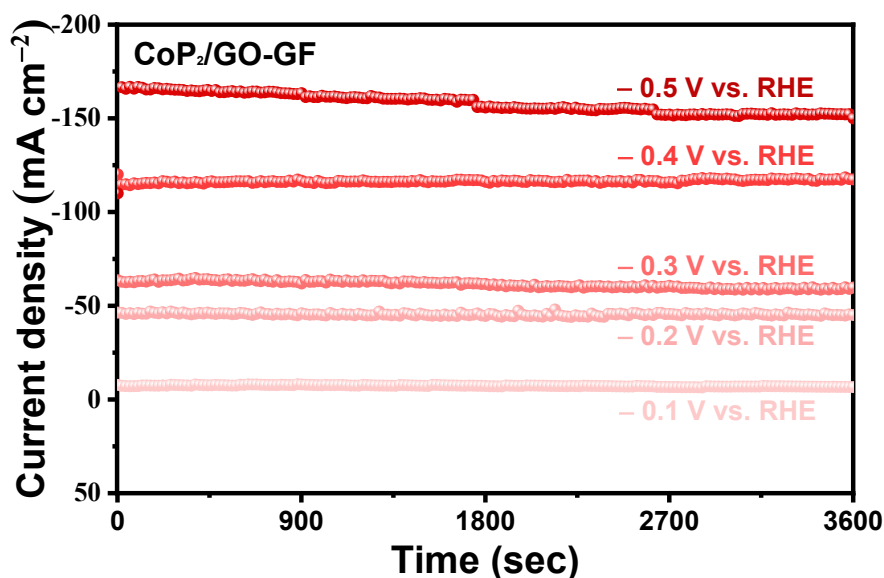

**Figure S12.** Bulk electrolysis of  $\text{NO}_2\text{RR}$  over  $\text{CoP}_2/\text{GO-GF}$  samples measured in at potential from 0 to  $-0.4$  V vs. RHE.

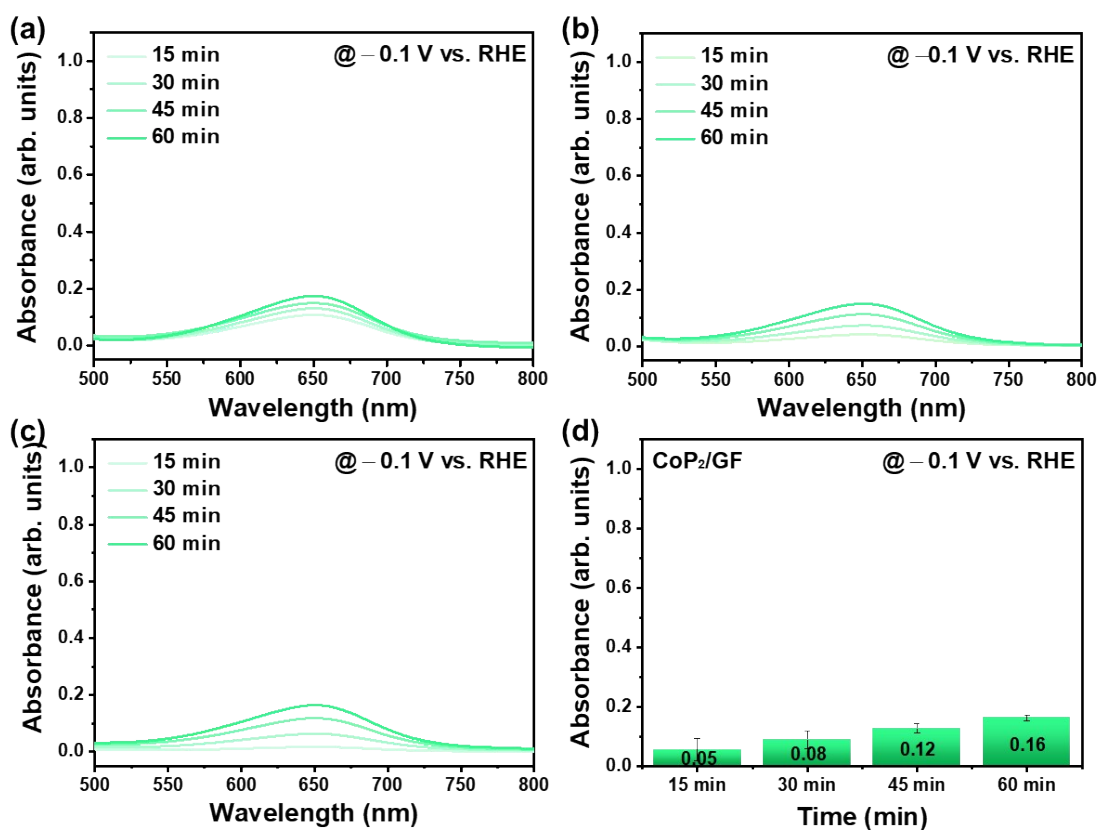

**Figure S13.** UV-Vis absorption spectra of  $\text{NH}_4^+$  produced from  $\text{CoP}_2/\text{GO-GF}$  samples: (a-c) representative spectra and (d) average absorbance values calculated from three repetitive studies at  $-0.1$  V vs. RHE.

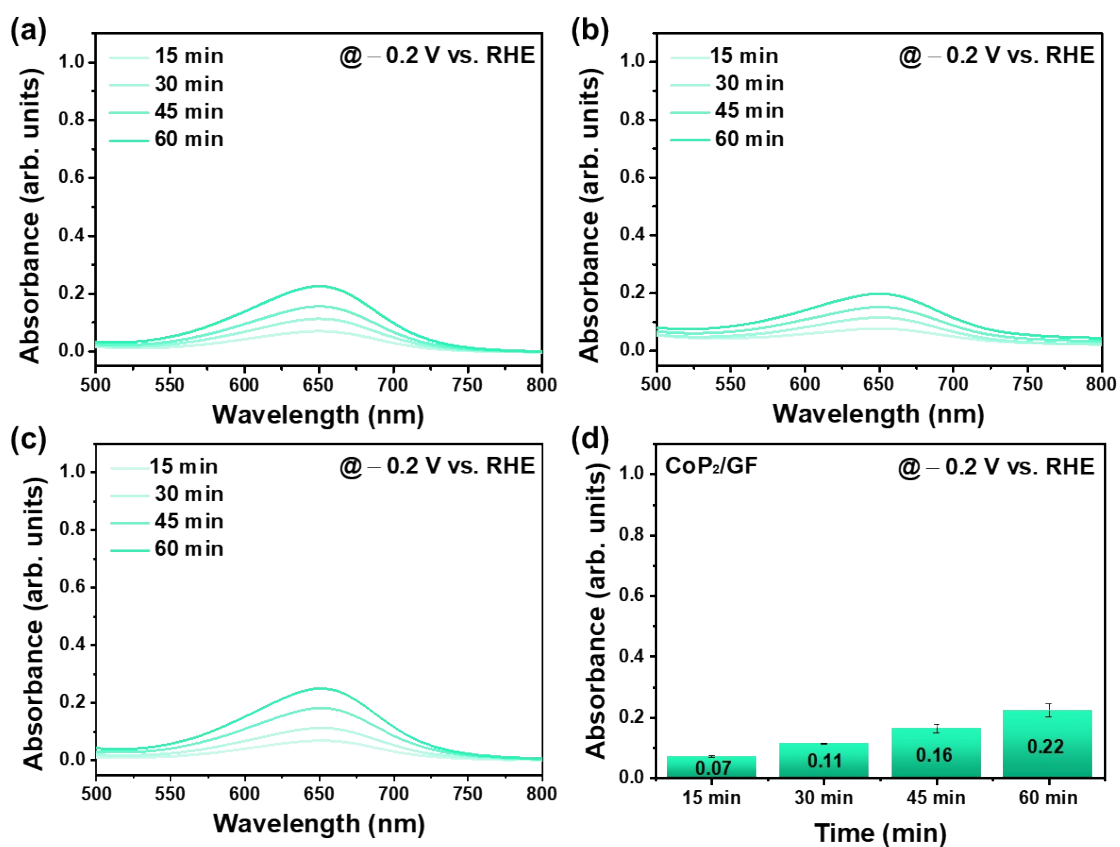

**Figure S14.** UV-Vis absorption spectra of  $\text{NH}_4^+$  produced from  $\text{CoP}_2/\text{GO-GF}$  samples: (a-c) representative spectra and (d) average absorbance values calculated from three repetitive studies at  $-0.2 \text{ V vs. RHE}$ .

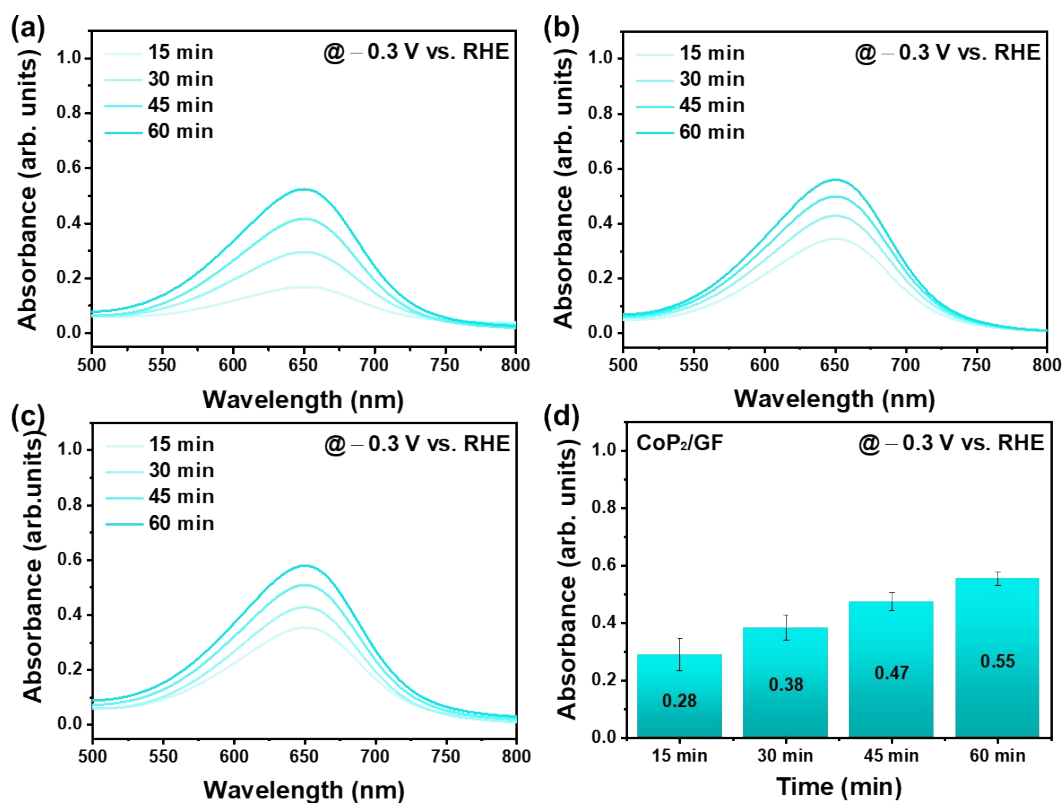

**Figure S15.** UV-Vis absorption spectra of  $\text{NH}_4^+$  produced from  $\text{CoP}_2/\text{GO-GF}$  samples: (a-c) representative spectra and (d) average absorbance values calculated from three repetitive studies at  $-0.3 \text{ V vs. RHE}$ .

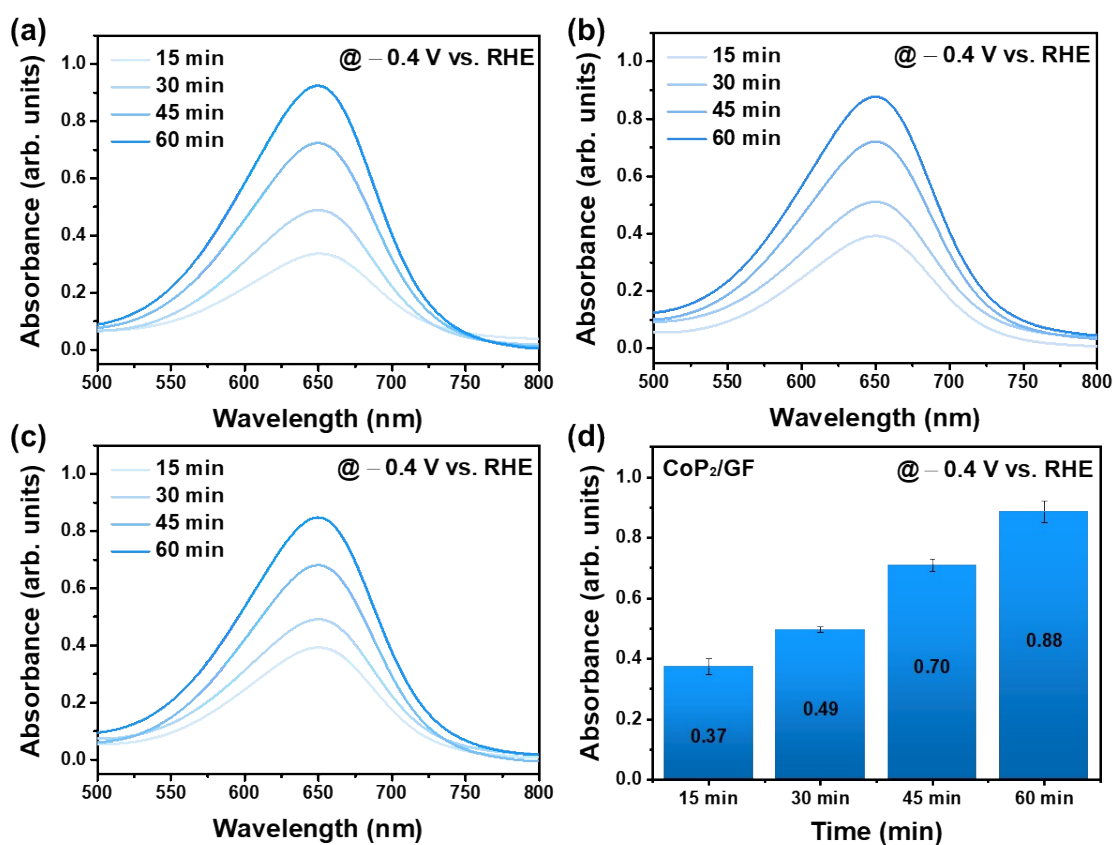

**Figure S16.** UV-Vis absorption spectra of  $\text{NH}_4^+$  produced from  $\text{CoP}_2/\text{GO-GF}$  samples: (a-c) representative spectra and (d) average absorbance values calculated from three repetitive studies at  $-0.4 \text{ V vs. RHE}$ .

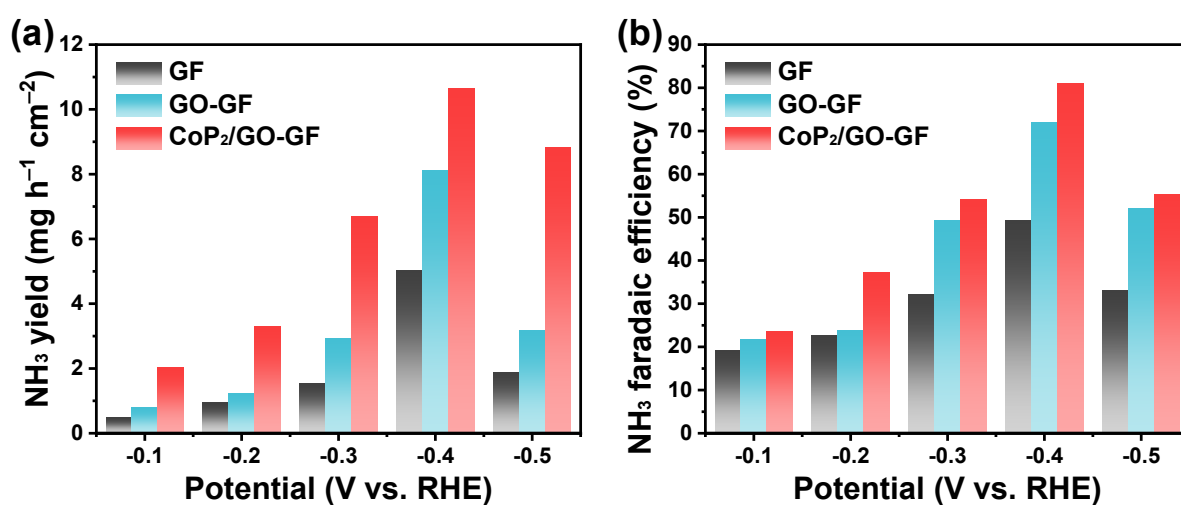

**Figure S17.** Electrochemical  $\text{NH}_4^+$  production over GF, GO-GF, and  $\text{CoP}_2/\text{GO-GF}$ : (a)  $\text{NH}_4^+$  yield and (b)  $\text{NH}_4^+$  faradaic efficiency calculated from UV-Vis absorption.



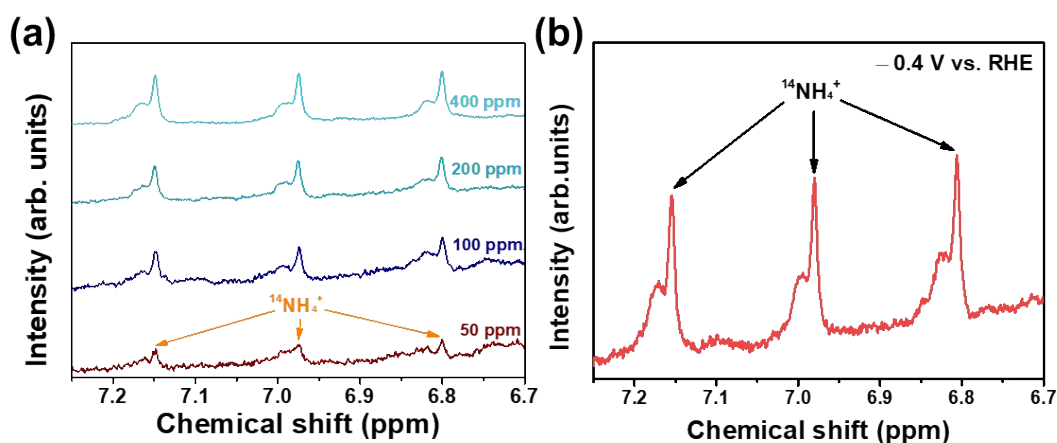

**Figure S18.**  $^1\text{H}$  NMR of  $\text{NH}_4^+$ : (a) calibration spectra for N-  $\text{NH}_4^+$  using  $\text{NH}_4\text{Cl}$  standard solutions (50-400 ppm) and (b)  $^1\text{H}$  NMR spectrum of the catholyte solution after 60 minutes of  $\text{NO}_2\text{RR}$  over  $\text{CoP}_2/\text{GO-GF}$  at  $-0.4\text{ V vs. RHE}$ .

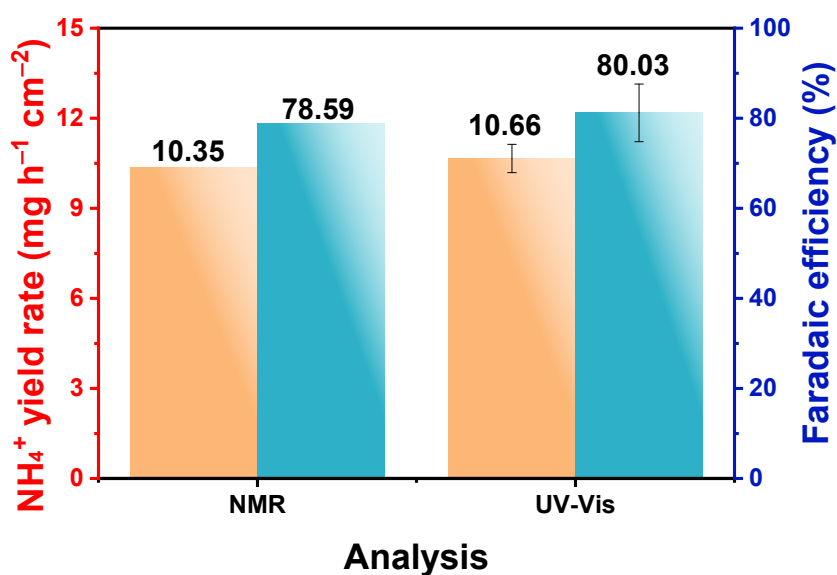

**Figure S19.** Comparative quantification of N- $\text{NH}_4^+$  by UV-Vis and  $^1\text{H}$  NMR spectroscopy:  $\text{NH}_4^+$  yield and faradaic efficiency for  $\text{CoP}_2/\text{GO-GF}$ .

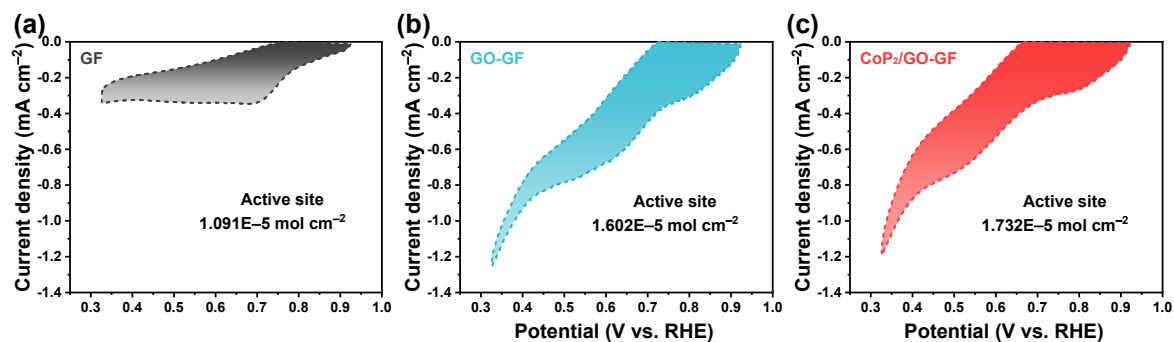

**Figure S20.** CV curves for (a) bare GF, (b) CO<sub>2</sub> laser GF, and (c) CoP<sub>2</sub>/GO-GF, with corresponding active site density values calculated from the CV curves.

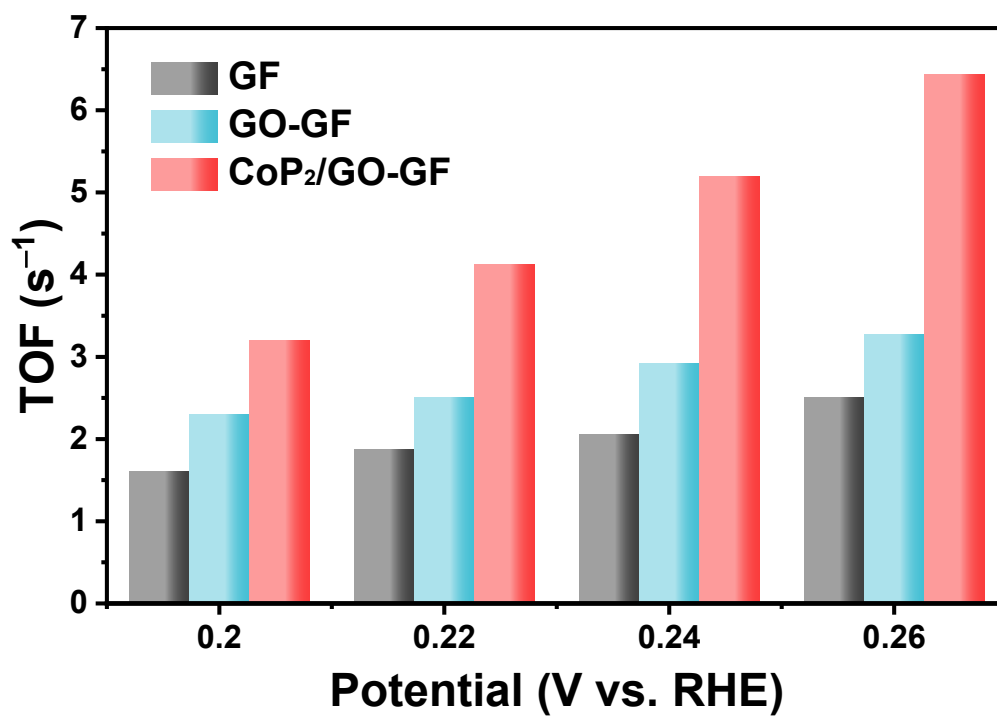

**Figure S21.** TOF graphs for (a) bare GF, (b) CO<sub>2</sub> laser GF, and (c) CoP<sub>2</sub>/GO-GF from NO<sub>2</sub>RR.

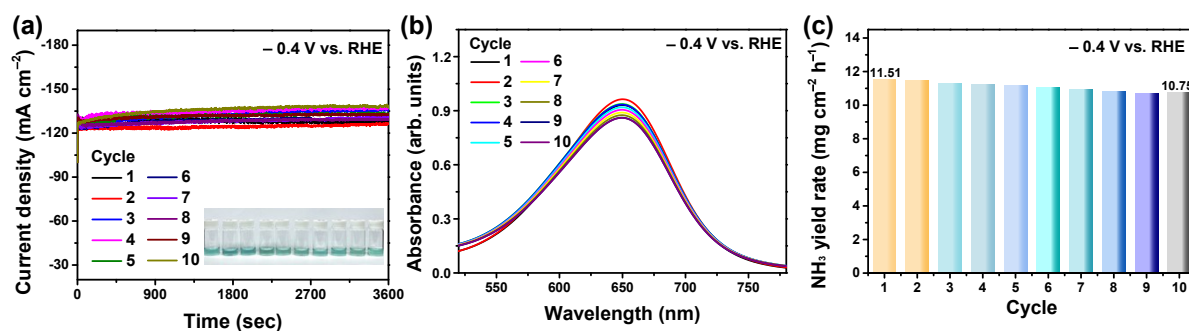

**Figure S22.** Electrocatalytic stability and performance of CoP<sub>2</sub>/GO-GF for NO<sub>2</sub>RR: (a) Electrocatalytic stability over 10 consecutive cycles at -0.4 V vs. RHE, with refilling the fresh electrolyte at the start of each cycle, (b) absorption spectra recorded after every 1 hr, and (c) NH<sub>3</sub> yield produced during 10 consecutive cycles of NO<sub>2</sub>RR.

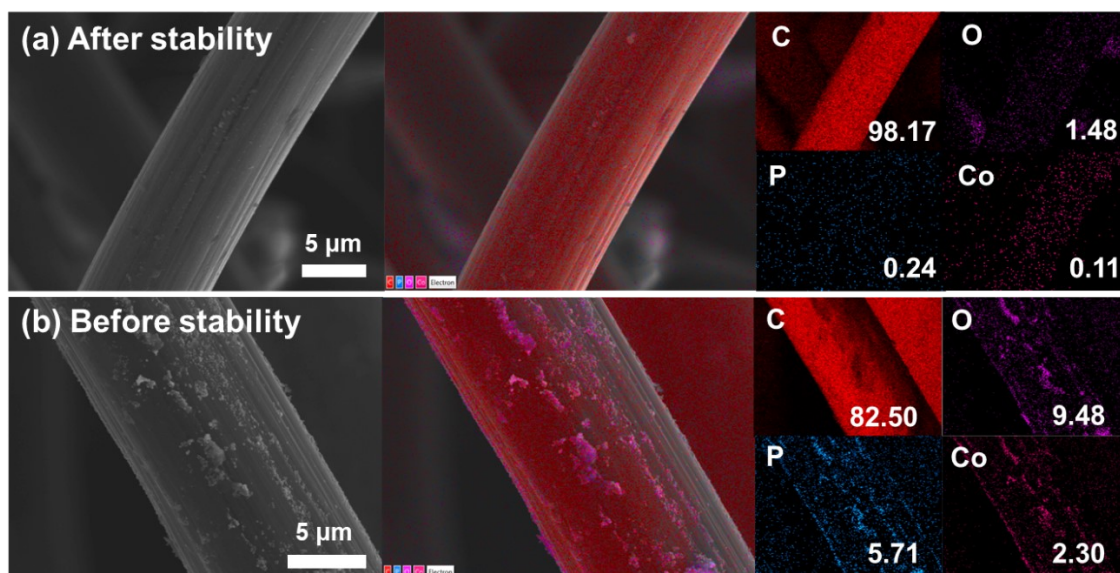

**Figure S23.** FESEM images and corresponding colour maps of CoP<sub>2</sub>/GO-GF: (a) after the NO<sub>2</sub>RR stability study, and (b) before the NO<sub>2</sub>RR stability study

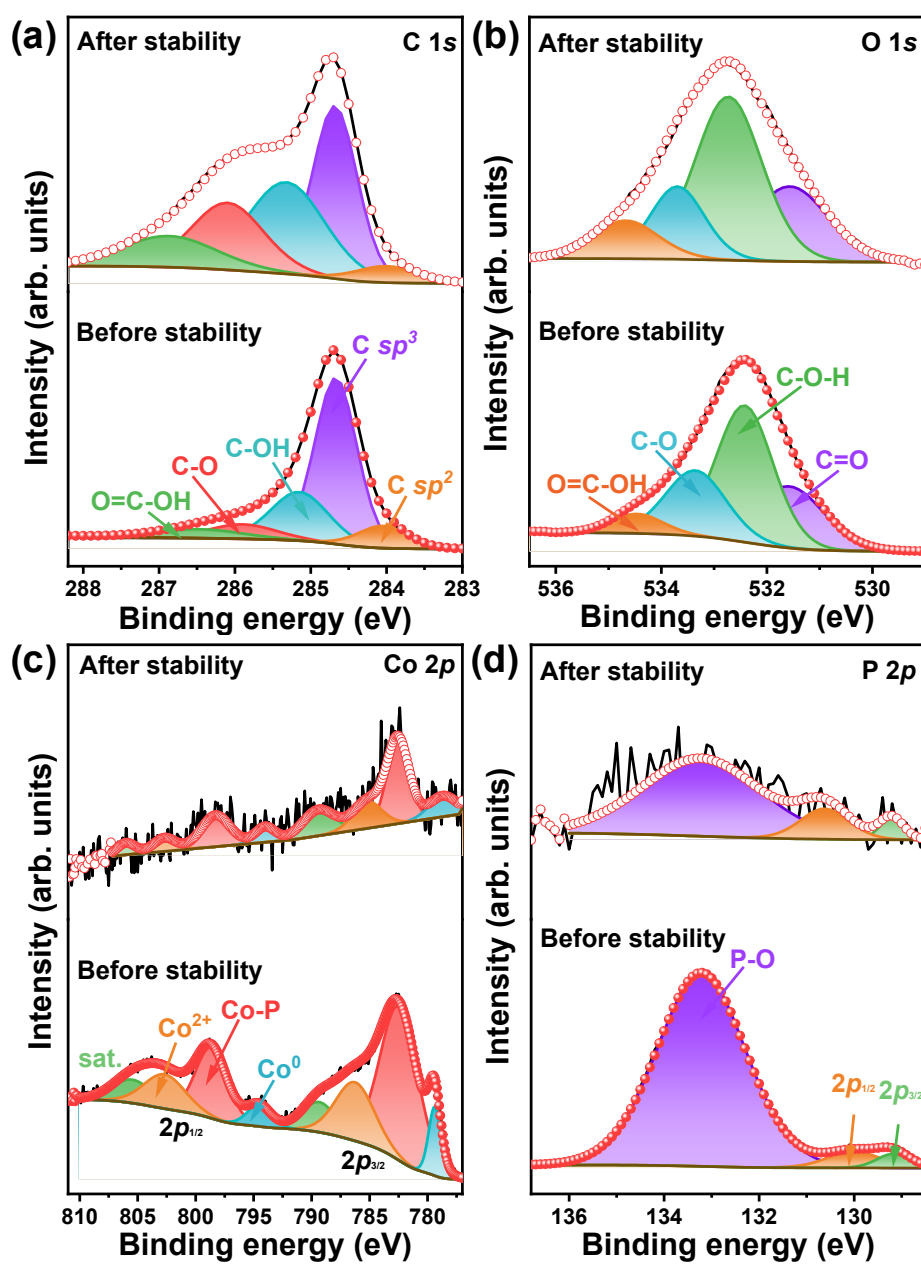

Figure S24. XPS spectra of CoP<sub>2</sub>/GO-GF after NO<sub>2</sub>RR stability study.

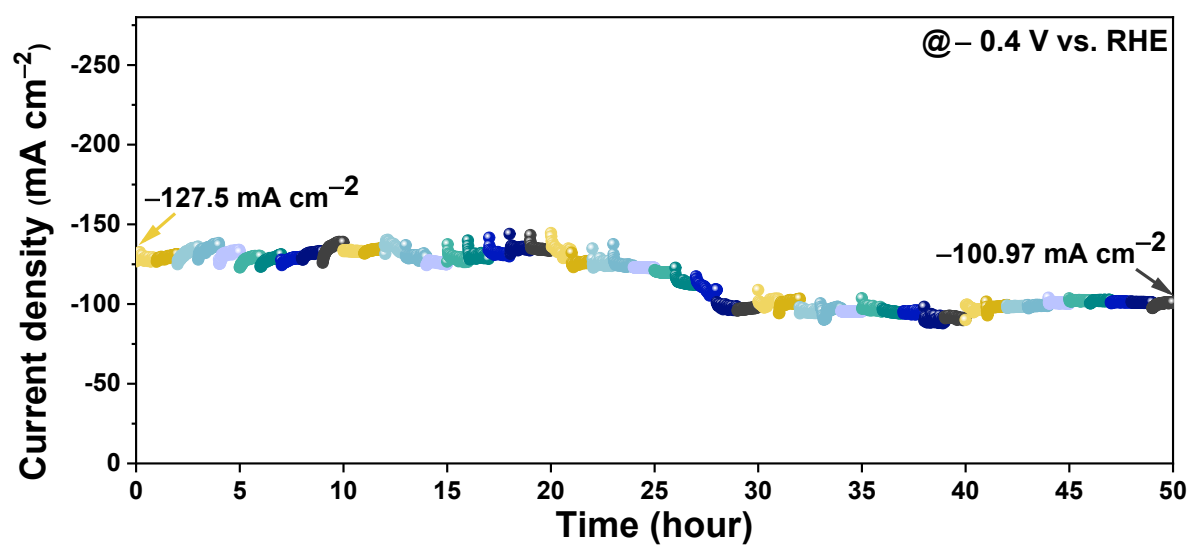

Figure S25.  $\text{NO}_2\text{RR}$  performance on  $\text{CoP}_2/\text{GO-GF}$  for 50 consecutive cycles.

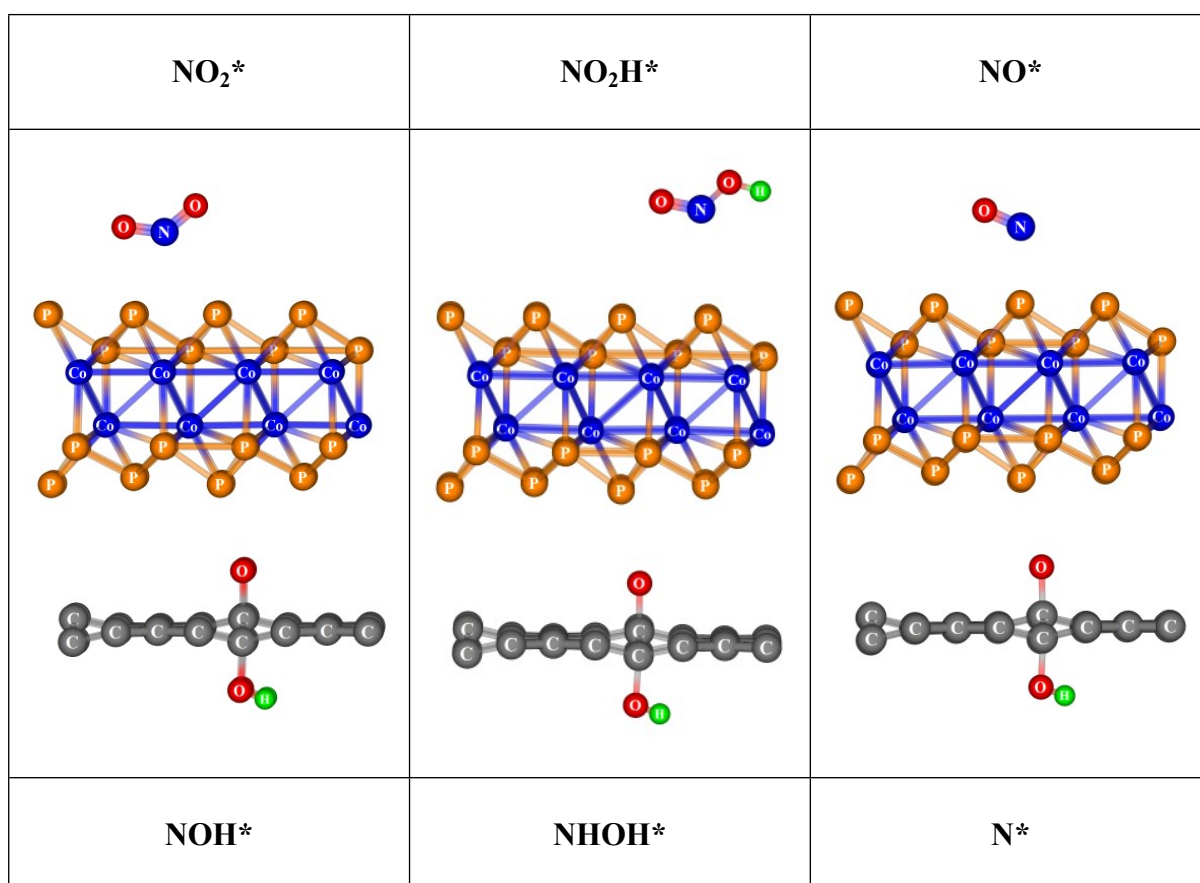

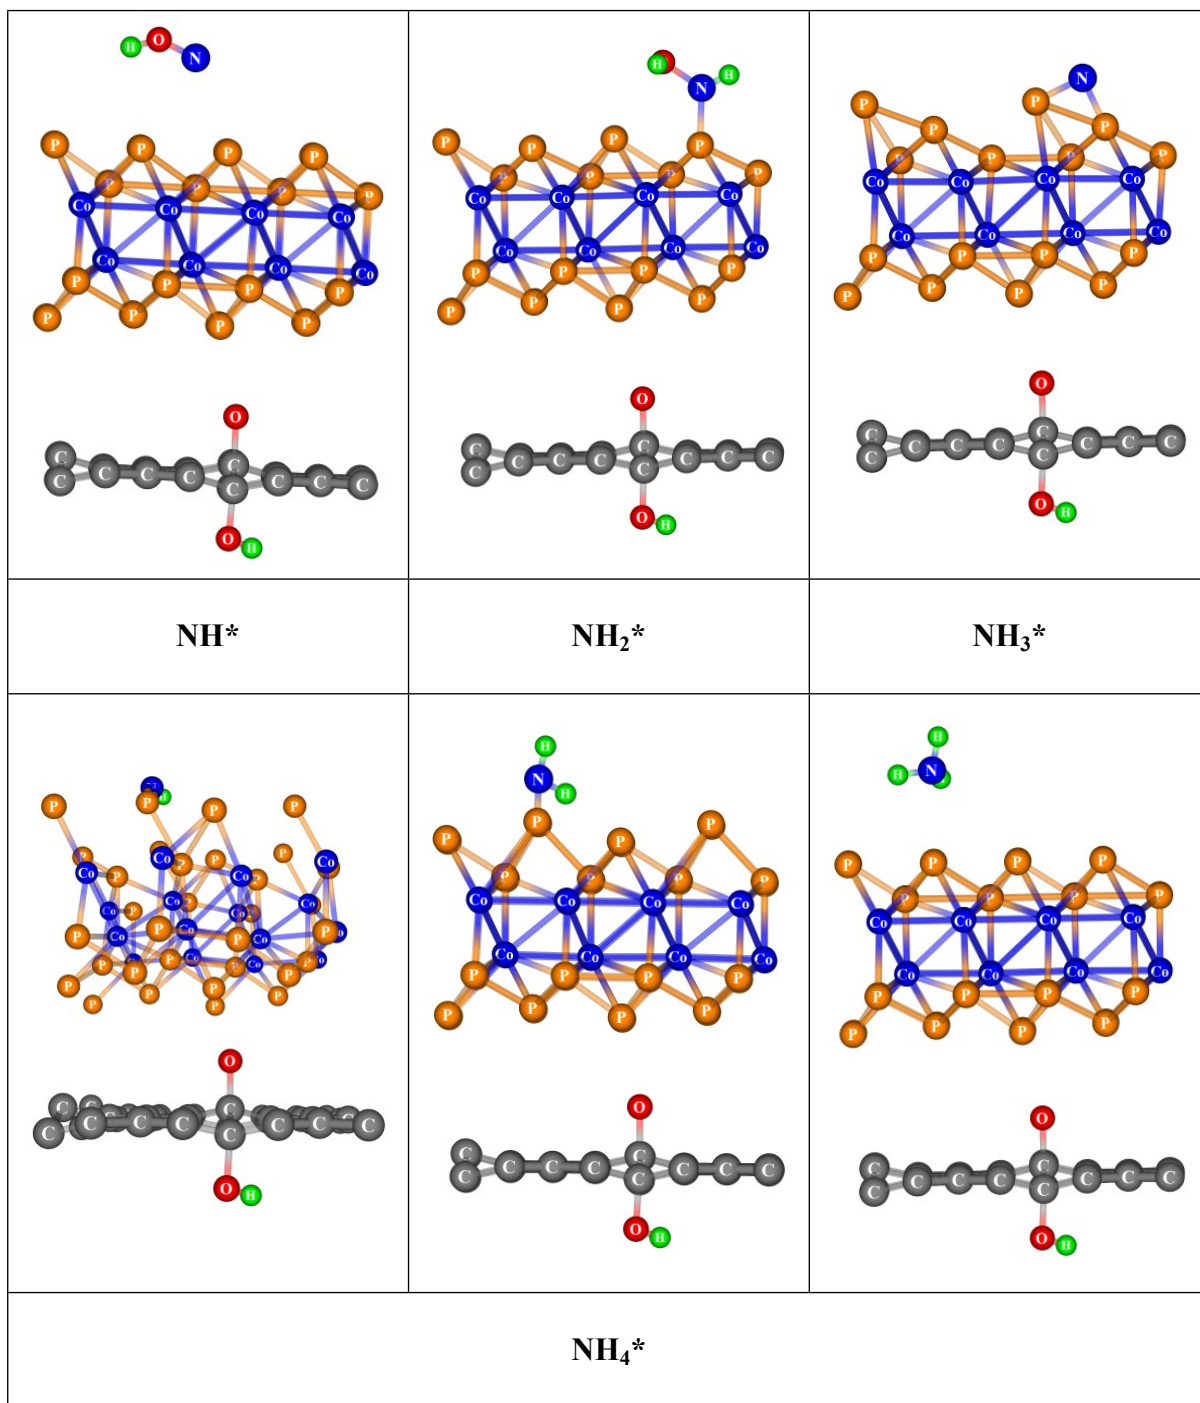

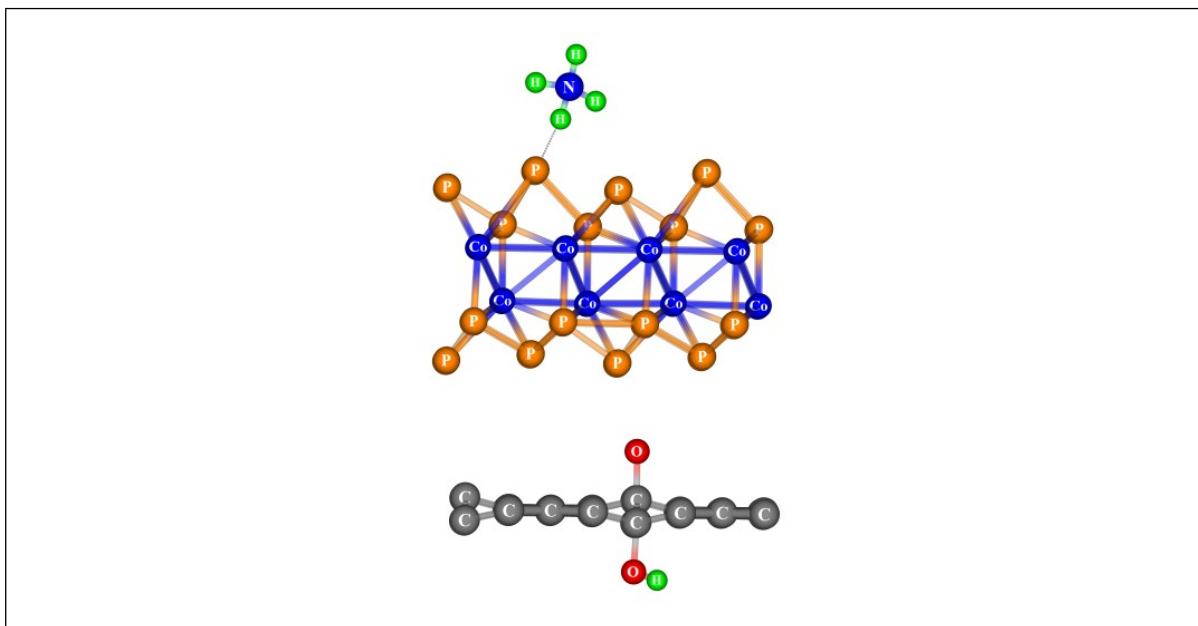

**Figure S26.** Optimized images of  $\text{NO}_2^*$ ,  $\text{NHO}_2\text{H}^*$ ,  $\text{NOH}^*$ ,  $\text{NHOH}^*$ ,  $\text{N}^*$ ,  $\text{NH}^*$ ,  $\text{NH}_2^*$ ,  $\text{NH}_3^*$ , and  $\text{NH}_4^*$  intermediates adsorbed structures.

**Table S1.** Comparison of ammonia yield from the literature studies.

| Catalysts        | $\text{NH}_3$ yield         | Faradaic efficiency | Reference |
|------------------|-----------------------------|---------------------|-----------|
| Ni@MDC           | $6.3 \text{ mg h}^{-1}$     | 65.4%               | 12        |
| CoP-CNS          | $8.47 \text{ mmol}$         | 88.6%               | 13        |
| AgNDs            | $0.6 \text{ mg h}^{-1}$     | 10.1%               | 14        |
| O-Cu-PTCDA       | $0.43 \text{ mg h}^{-1}$    | 85.9%               | 15        |
| PCN-NV4          | $0.00809 \text{ mg h}^{-1}$ | 11.59%              | 16        |
| CoP nanoarray/TM | $1.4 \text{ mg h}^{-1}$     | 91.5%               | 17        |
| Co-10/CNT@CP     | $19.3 \text{ mg h}^{-1}$    | 95%                 | 18        |
| BCP              | $0.28 \text{ mg h}^{-1}$    | 54.5%               | 19        |
| Ru SA-NC         | $12.8 \text{ mg h}^{-1}$    | 97.8%               | 20        |

|                                               |                            |        |           |
|-----------------------------------------------|----------------------------|--------|-----------|
| Fe-PPy SACs                                   | 2.75 mg h <sup>-1</sup>    | ~100%  | 21        |
| FeSA-N-C                                      | 0.00748 mgh <sup>-1</sup>  | 56.55% | 22        |
| Ni-NSA-V <sub>Ni</sub>                        | 4.0 mg h <sup>-1</sup>     | 88.9%  | 23        |
| CoP NA/TM                                     | 2.3 mg h <sup>-1</sup>     | 90%    | 24        |
| MoFe protein                                  | 234 nmol                   | ~100%  | 25        |
| (30min)                                       |                            |        |           |
| CoB@TiO <sub>2</sub> /TP                      | 233.1 μmol h <sup>-1</sup> | 95.2%  | 26        |
| Ti <sub>3</sub> C <sub>2</sub> T <sub>x</sub> | 0.65 mg h <sup>-1</sup>    | 75%    | 27        |
| Cu <sub>3</sub> P NA/CF                       | ~95 μmol h <sup>-1</sup>   | ~91%   | 28        |
| Fe-SAC                                        | 20 mg h <sup>-1</sup>      | 75%    | 29        |
| CoP <sub>2</sub> /GO-GF                       | 10.3 mg h <sup>-1</sup>    | ~78%   | This work |

## Reference

1. G. Kresse and D. Joubert, *Physical Review B*, 1999, **59**, 1758-1775.
2. G. Kresse and J. Furthmüller, *Physical Review B*, 1996, **54**, 11169-11186.
3. J. P. Perdew, K. Burke and M. Ernzerhof, *Physical Review Letters*, 1996, **77**, 3865-3868.
4. P. E. Blöchl, *Physical Review B*, 1994, **50**, 17953-17979.
5. S. Grimme, S. Ehrlich and L. Goerigk, *Journal of Computational Chemistry*, 2011, **32**, 1456-1465.
6. H. J. Monkhorst and J. D. Pack, *Physical Review B*, 1976, **13**, 5188-5192.
7. P. E. Blöchl, O. Jepsen and O. K. Andersen, *Physical Review B*, 1994, **49**, 16223-16233.
8. J. K. Nørskov, T. Bligaard, A. Logadottir, J. R. Kitchin, J. G. Chen, S. Pandalov and U. Stimming, *Journal of The Electrochemical Society*, 2005, **152**, J23.
9. P. Lv, D. Wu, B. He, X. Li, R. Zhu, G. Tang, Z. Lu, D. Ma and Y. Jia, *Journal of Materials Chemistry A*, 2022, **10**, 9707-9716.



10. K. Yang, S.-H. Han, C. Cheng, C. Guo, T. Li and Y. Yu, *Journal of the American Chemical Society*, 2024, **146**, 12976-12983.
11. N. Sathishkumar, S.-Y. Wu and H.-T. Chen, *Applied Surface Science*, 2022, **598**, 153829.
12. X. He, X. Li, X. Fan, J. Li, D. Zhao, L. Zhang, S. Sun, Y. Luo, D. Zheng, L. Xie, A. M. Asiri, Q. Liu and X. Sun, *ACS Applied Nano Materials*, 2022, **5**, 14246-14250.
13. K. Fan, W. Xie, J. Li, Y. Sun, P. Xu, Y. Tang, Z. Li and M. Shao, *Nature Communications*, 2022, **13**, 7958.
14. W. Li, K. Li, Y. Ye, S. Zhang, Y. Liu, G. Wang, C. Liang, H. Zhang and H. Zhao, *Communications Chemistry*, 2021, **4**, 10.
15. G.-F. Chen, Y. Yuan, H. Jiang, S.-Y. Ren, L.-X. Ding, L. Ma, T. Wu, J. Lu and H. Wang, *Nature Energy*, 2020, **5**, 605-613.
16. C. Lv, Y. Qian, C. Yan, Y. Ding, Y. Liu, G. Chen and G. Yu, *Angewandte Chemie International Edition*, 2018, **57**, 10246-10250.
17. X. Fan, L. Xie, J. Liang, Y. Ren, L. Zhang, L. Yue, T. Li, Y. Luo, N. Li, B. Tang, Y. Liu, S. Gao, A. A. Alshehri, Q. Liu, Q. Kong and X. Sun, *Nano Research*, 2022, **15**, 3050-3055.
18. S.-L. Meng, C. Zhang, C. Ye, J.-H. Li, S. Zhou, L. Zhu, X.-B. Li, C.-H. Tung and L.-Z. Wu, *Energy & Environmental Science*, 2023, **16**, 1590-1596.
19. S. Liu, T. Qian, M. Wang, H. Ji, X. Shen, C. Wang and C. Yan, *Nature Catalysis*, 2021, **4**, 322-331.
20. Z. Ke, D. He, X. Yan, W. Hu, N. Williams, H. Kang, X. Pan, J. Huang, J. Gu and X. Xiao, *ACS Nano*, 2023, **17**, 3483-3491.
21. P. Li, Z. Jin, Z. Fang and G. Yu, *Energy & Environmental Science*, 2021, **14**, 3522-3531.
22. M. Wang, S. Liu, T. Qian, J. Liu, J. Zhou, H. Ji, J. Xiong, J. Zhong and C. Yan, *Nature Communications*, 2019, **10**, 341.
23. C. Wang, W. Zhou, Z. Sun, Y. Wang, B. Zhang and Y. Yu, *Journal of Materials*

- Chemistry A*, 2021, **9**, 239-243.
24. G. Wen, J. Liang, Q. Liu, T. Li, X. An, F. Zhang, A. A. Alshehri, K. A. Alzahrani, Y. Luo, Q. Kong and X. Sun, *Nano Research*, 2022, **15**, 972-977.
25. R. D. Milton, S. Abdellaoui, N. Khadka, D. R. Dean, D. Leech, L. C. Seefeldt and S. D. Minteer, *Energy & Environmental Science*, 2016, **9**, 2550-2554.
26. L. Hu, D. Zhao, C. Liu, Y. Liang, D. Zheng, S. Sun, Q. Li, Q. Liu, Y. Luo, Y. Liao, L. Xie and X. Sun, *Inorganic Chemistry Frontiers*, 2022, **9**, 6075-6079.
27. R. Nittoor-Veedu, X. Ju, M. Langer, W. Gao, M. Otyepka and M. Pumera, *Small*, 2025, **21**, 2410105.
28. J. Liang, B. Deng, Q. Liu, G. Wen, Q. Liu, T. Li, Y. Luo, A. A. Alshehri, K. A. Alzahrani, D. Ma and X. Sun, *Green Chemistry*, 2021, **23**, 5487-5493.
29. Z.-Y. Wu, M. Karamad, X. Yong, Q. Huang, D. A. Cullen, P. Zhu, C. Xia, Q. Xiao, M. Shakouri, F.-Y. Chen, J. Y. Kim, Y. Xia, K. Heck, Y. Hu, M. S. Wong, Q. Li, I. Gates, S. Siahrostami and H. Wang, *Nature Communications*, 2021, **12**, 2870.
